# Supplementary material for: FUS affects circular RNA expression in murine embryonic stem cell-derived motor neurons
Source: PubMed Central journal article supplement (PMC5379105; doi:10.1038/ncomms14741), 2017-03-30
Supplement: ncomms14741-s1.pdf [file ncomms14741-s1.pdf]

# Supplementary Figure 1

**a**

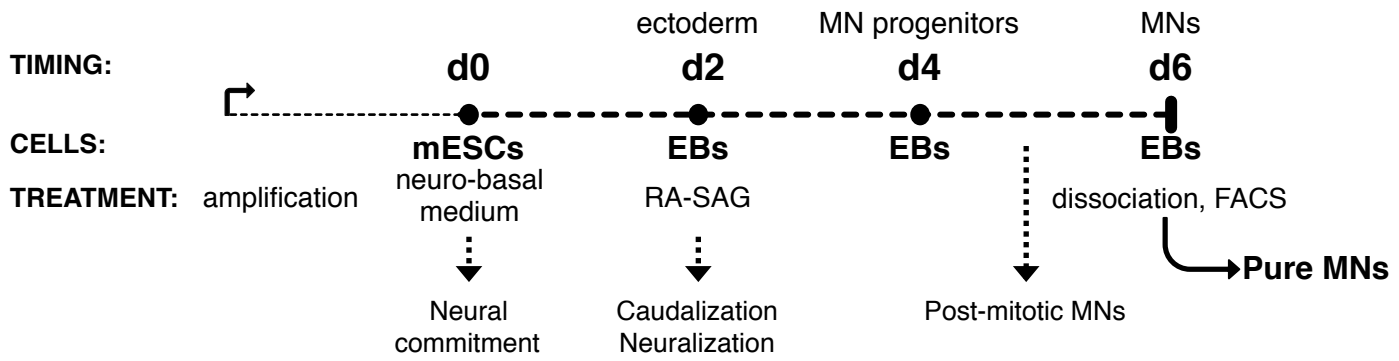

**b**

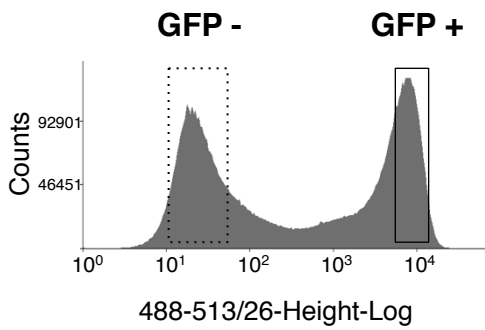

**c**

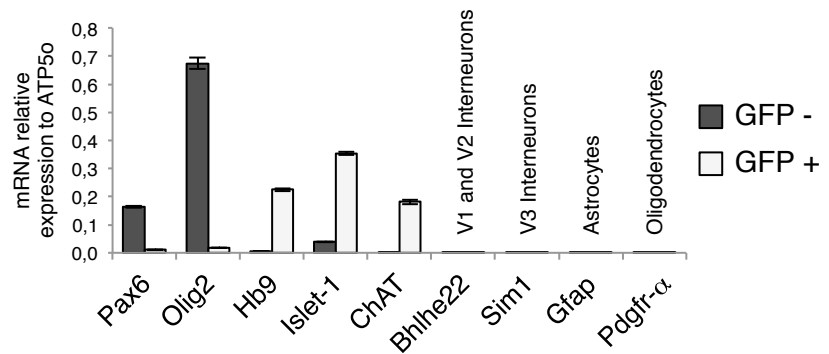

**d**

circRNA included exclusively in "5'UTR"

10:14004201-14066684

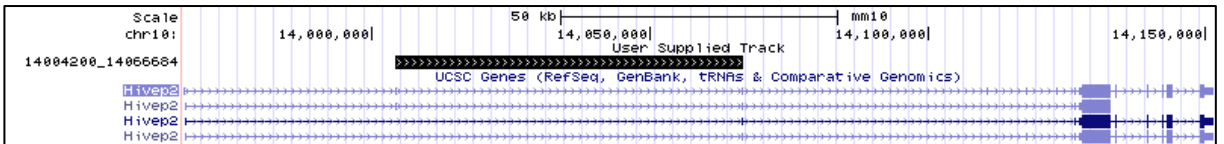

circRNA included exclusively in "CDS"

1:163883383-163888305

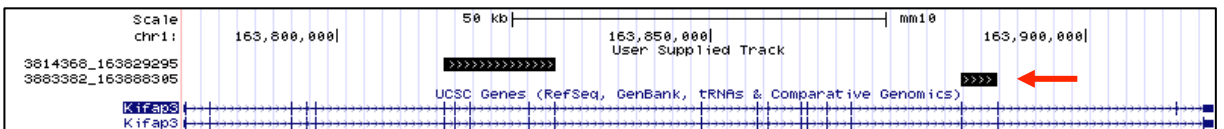

circRNA included exclusively in "3'UTR"

17:24897832-24897931

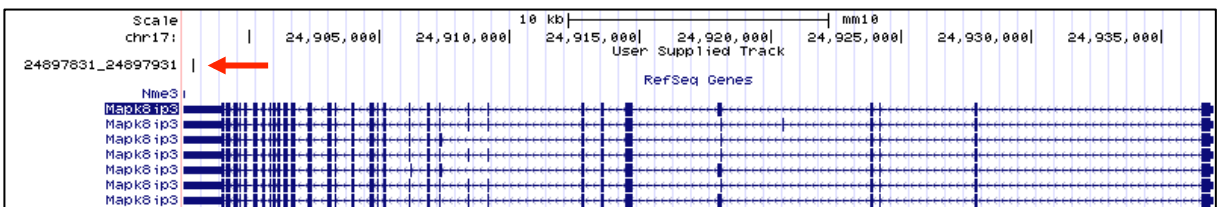



# Supplementary Figure 1

circRNA in "5'UTR", "cds" and "introns"

6:115637599-115669424

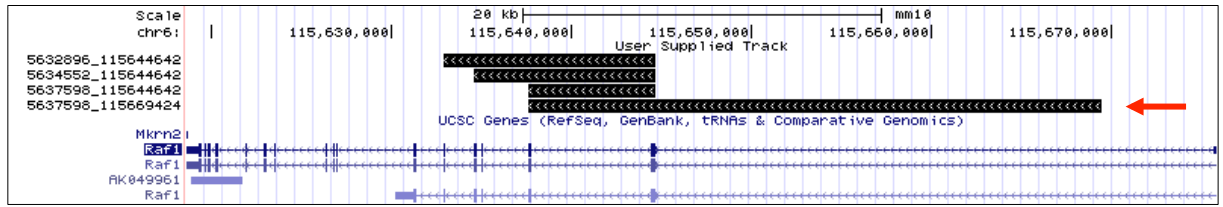

circRNA in "5'UTR" and "introns"

1:97653130-97654689

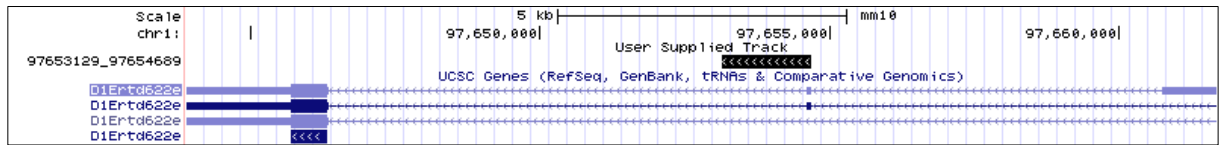

circRNA in "cgs" and "introns"

7:111597803-111599123

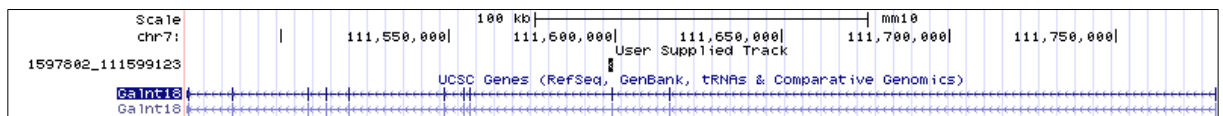

e

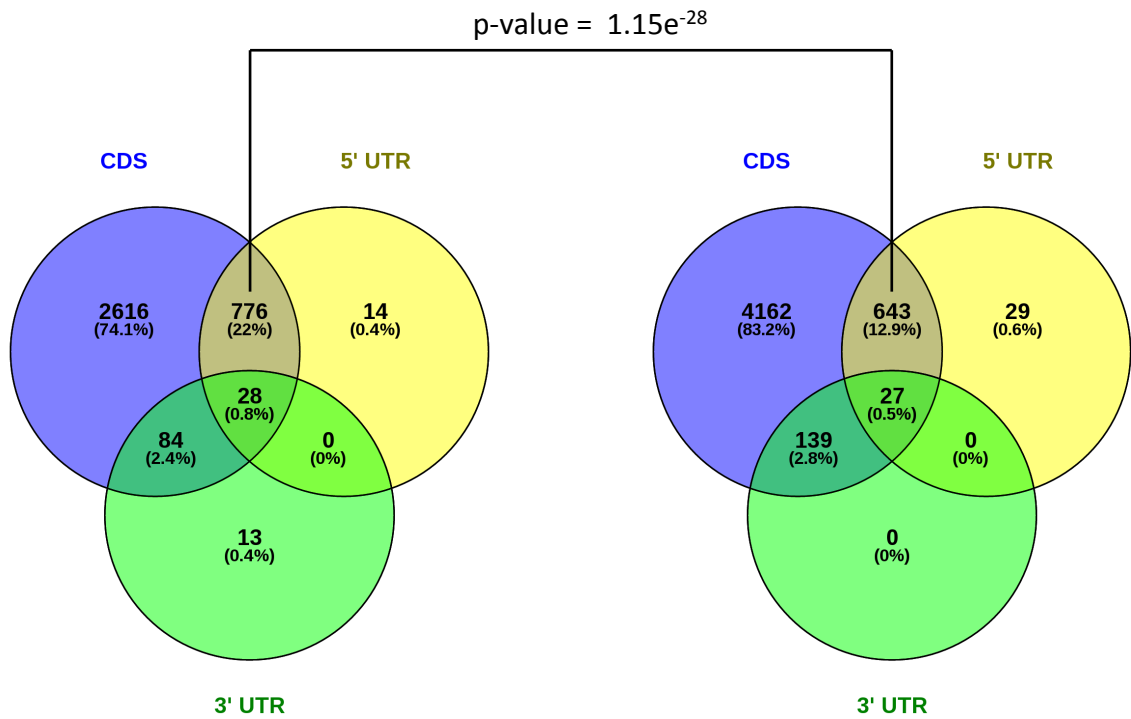

Motor neuron circRNAs

Faux random circRNAs

## Supplementary Figure 1

**Supplementary Figure 1:** (a) Mouse embryonic stem cells (mESCs), derived from wild type (*FUS*<sup>+/+</sup>) or knock out (*FUS*<sup>-/-</sup>)<sup>1</sup> *FUS* mice and expressing a GFP reporter under the control of the motor neuron-specific Hb9 promoter (*Hb9::GFP* transgene)<sup>2</sup>, were differentiated into motor neurons according to Wichterle *et al*<sup>β</sup>. The procedure relies on the formation of embryoid bodies (EBs), neurally committed through maintenance in differentiation medium. Retinoic acid and smoothed agonist (RA-SAG) leads neural progenitors to caudal and ventral patterning respectively<sup>2</sup>, which finally results into spinal motor neuron differentiation. After four days of RA-SAG treatment, EBs were dissociated and *Hb9::GFP*<sup>+</sup> cells were purified by FAC-sorting. (b) The distribution of the *Hb9::GFP*<sup>-</sup> (GFP<sup>-</sup>) and *Hb9::GFP*<sup>+</sup> (GFP<sup>+</sup>) cell populations analysed by fluorescence-activated cell sorting (FACS); post-sorting cytofluorimetric evaluation highlighted a purity level higher than 98% of the indicated GFP<sup>+</sup> fraction. (c) Histogram showing that the pool of *Hb9::GFP*<sup>-</sup> cells specifically express the Pax6 and Olig2 transcription factors that, within the domain of neuronal precursors, are responsible for establishing MN progenitors<sup>2</sup>. These markers are at almost undetectable levels in the GFP<sup>+</sup> population. On the other hand, expression of genes required for consolidation of identity (*Hb9*), development (*Islet-1*) and function (*ChAT*) of spinal motor neurons was highly enriched in *Hb9::GFP*<sup>+</sup> cell fraction. As expected for the differentiation protocol utilized, the markers for astrocytes (*Gfap*) and oligodendrocytes (*Pdgfr-α*) were almost undetectable in both cell populations. Notably, also the V1 and V2 (*Bhlhe22*) and V3 interneuron (*Sim1*) markers were not detectable. These data confirm that the protocol adopted faithfully recapitulates *bona fide* motor neuron specification from mESCs, with motor neuron precursors mainly contained in the *Hb9::GFP*<sup>-</sup> cell pool, and the post-mitotic motor neurons present in the *Hb9::GFP*<sup>+</sup> cell fraction. (d) Genome browser plots for representative circRNAs from each category shown in Fig. 1C. (e) Localization of internal, non-intronic motoneuronal circRNAs and faux random circRNAs with respect to 5' UTR, 3'UTR and coding region of protein-coding transcripts. P-value was calculated performing Chi-square test comparing the number of real and faux circRNAs included in each region.

# Supplementary Figure 2

**a**

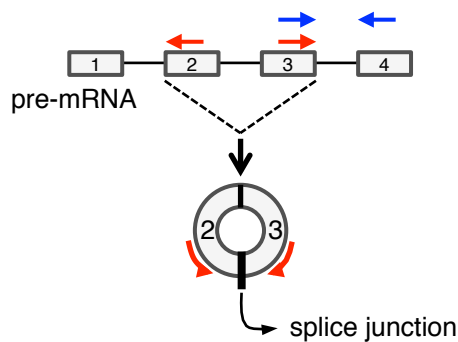

**b**

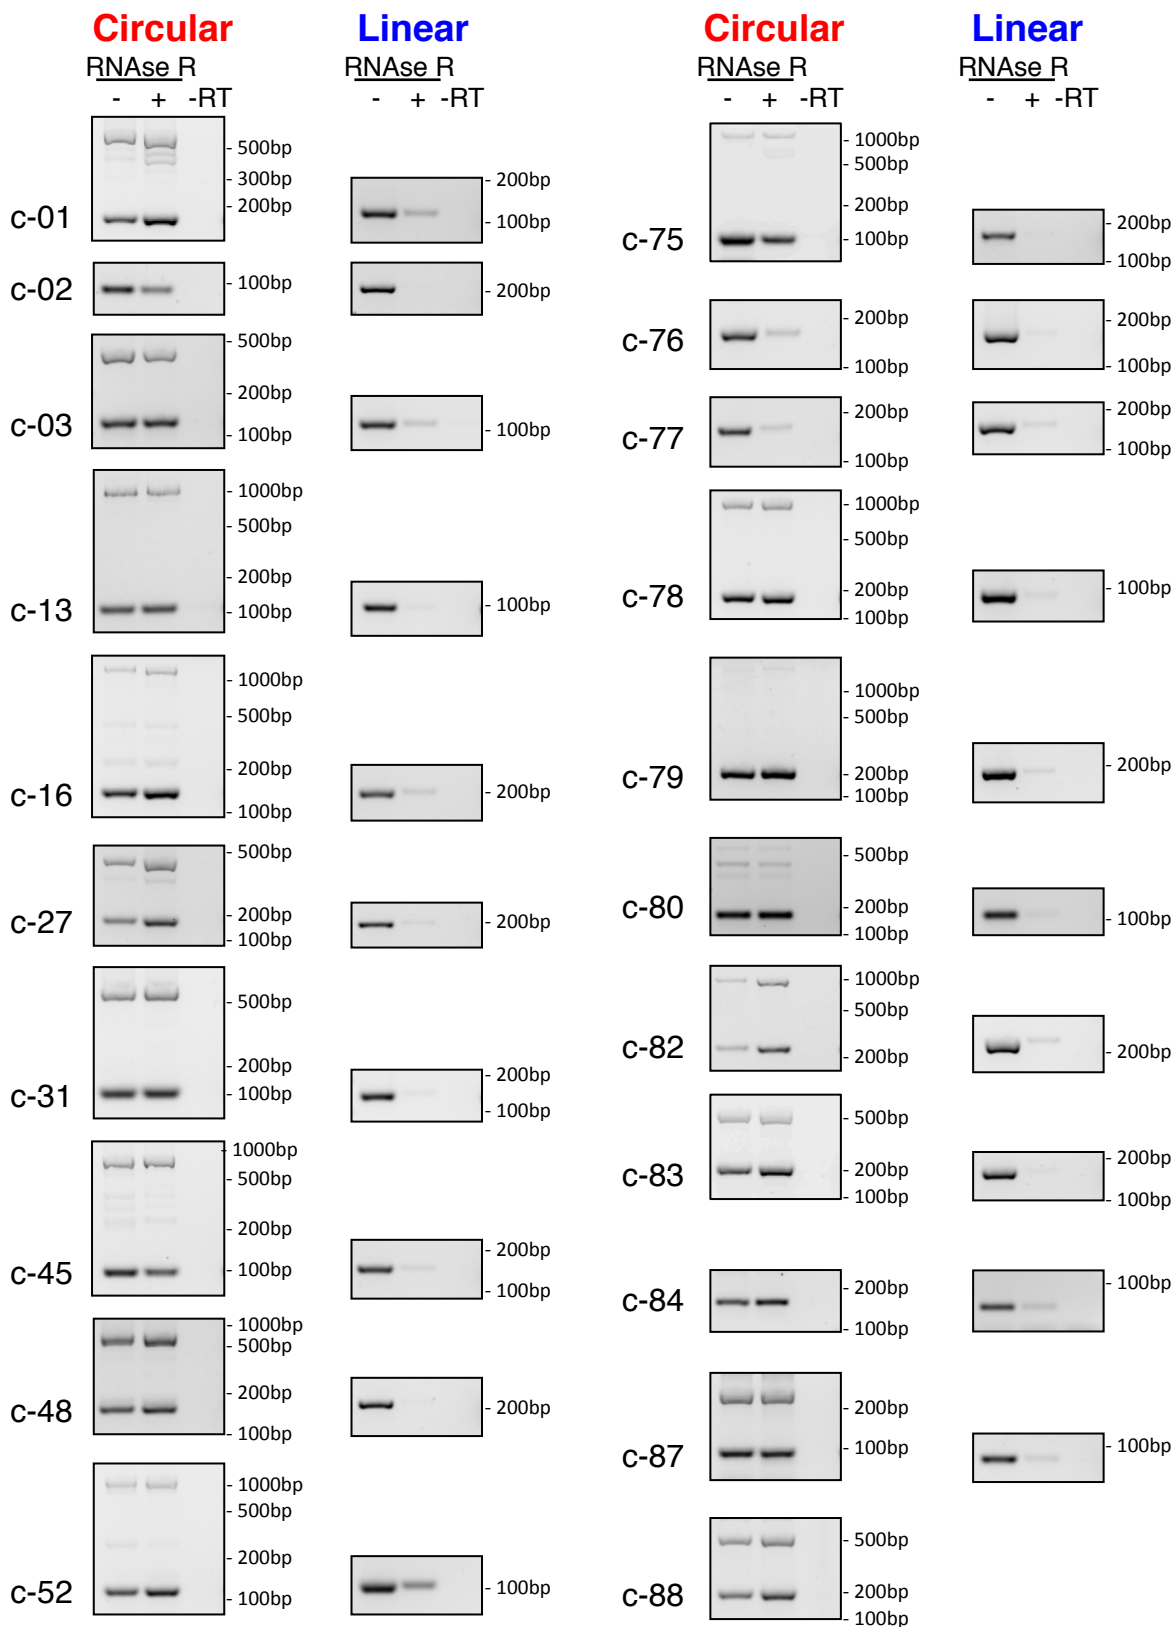

# Supplementary Figure 2

**c**

c-01

exon 2  
ATGCTTTCGTGAACAGCCAGGAATGGACACTCAGCCGATCGGTACCGGAGCTCAAAGTG  
exon 3  
GGAATTGTGGGTAACCTGGCCAGTGGCAAGTCTGCGCTGGTGCACCGGTACCTGACAGGCACGTACGTGCA  
GGAGGAATCTCCAGAAG  
exon 4  
GTGGCAGGTTCAAGAAGGAGATTGTTGTTGATGGACAGAGTTATCTGCTGCTGATTAGGGATGAAGGGGGCC  
CCCCGGAGGCACAG  
exon 5  
TTCGCCATGTGGGTGGACGCGGTTCATCTTTGTCTTCAGCTTGGAGGATGAGATCAGTTTCCAGACTGTCTACC  
ATTACTACAGCCGAATGGCCAACCTACAGGAACACCAGTGAGATCCCATTAGTGCTGGTGGGGACCCAGG  
exon 6  
ATGCCATAAGTTCCACCAACCCGAGGGTCATCGATGACGTCAGGGCTCGGAAGCTCTCCAATGACCTGAAGA  
GGTGCACGTACTATGAGACGTGCGCCACCTATGGGCTCAACGTGGAGCGGGTCTTCCAGGACG

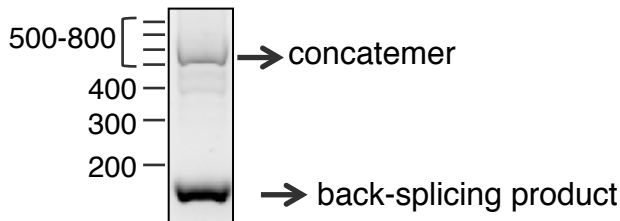

back-splicing product

exon 6 | exon 2

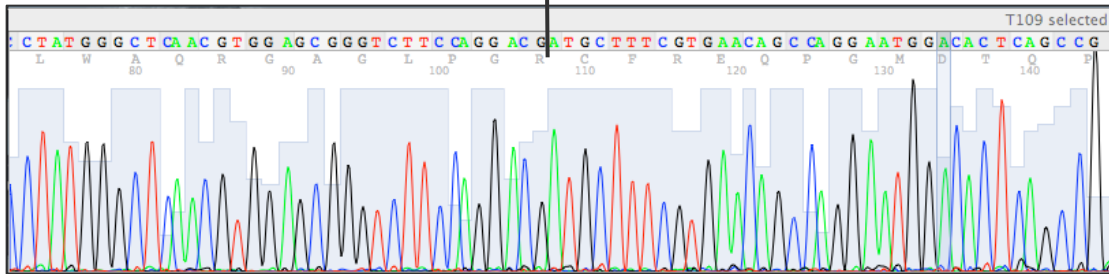

concatemer

exon 6 | exon 2

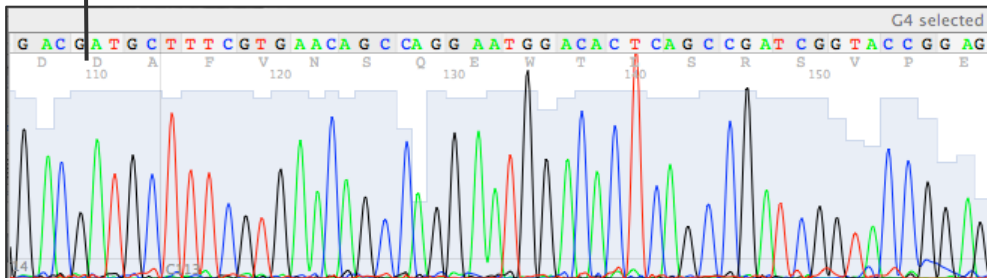

# Supplementary Figure 2

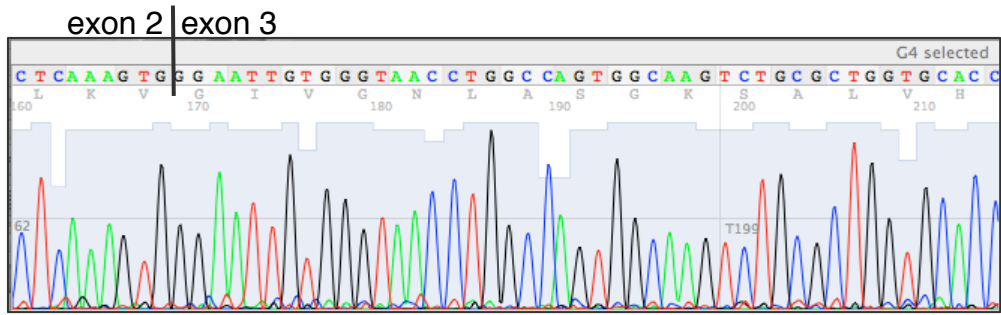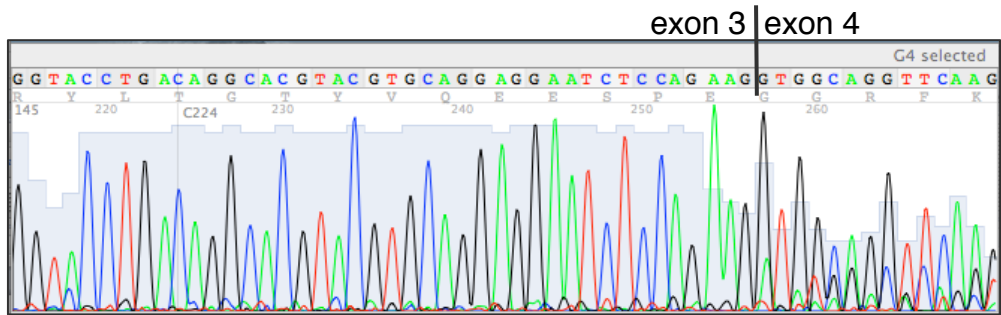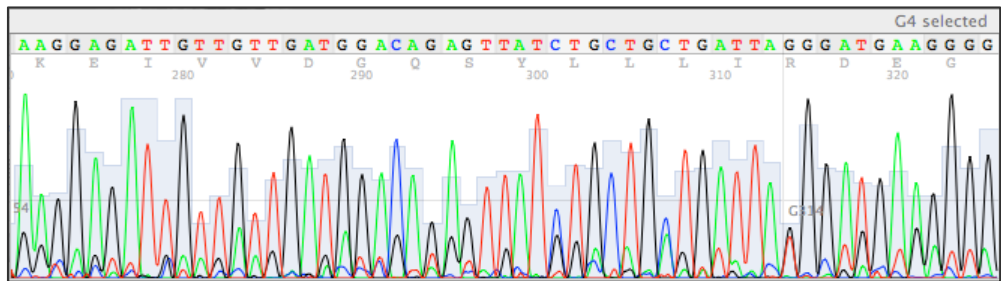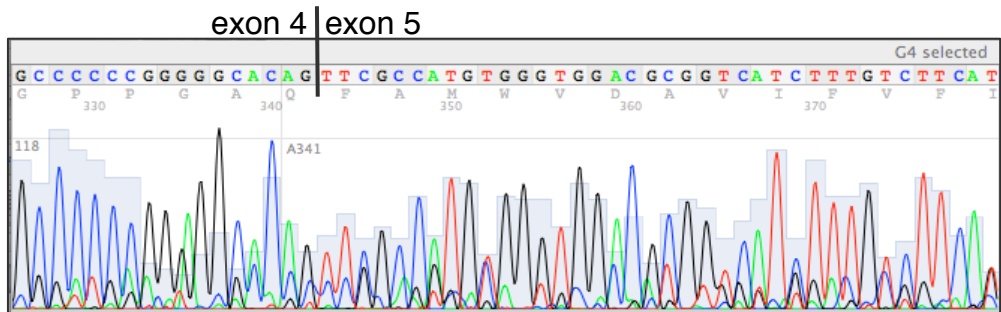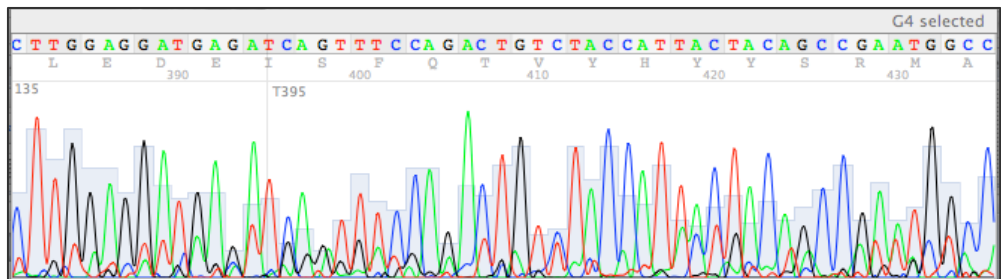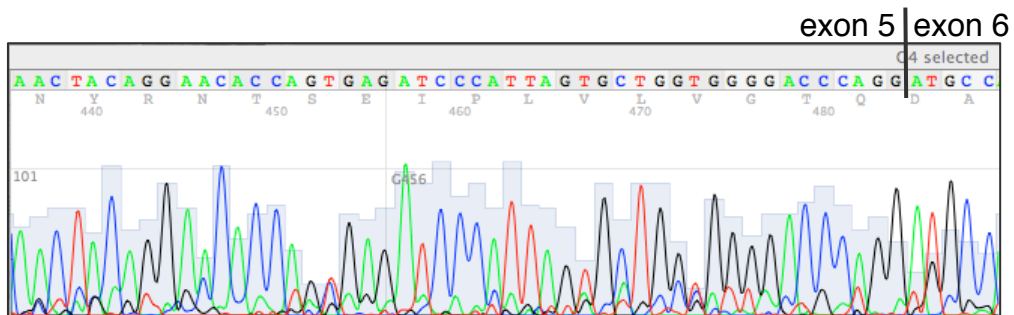

# Supplementary Figure 2

d

c-87

exon 2

AATAATCATGGGCCAGACTGGGAAGAAATCTGAGAAGGGACCGGTTTTGTTGGCGGAAGCGTGTAATCAGAG  
TACATGAGACTGAGACAGCTCAAGAGGTTTCAGAAGAGCTGATGAAGTAAAG

exon 3

ACTATGTTTAGTTCCAATCGTCAGAAAATTTTGAAAGAAGCTGAAACCTTAAACCAAGAGTGGAAGCAGCGGAG  
GATACAGCCTGTGCACATCATGACTTCT

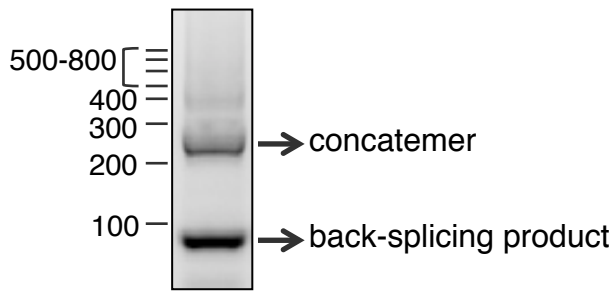

back-splicing product

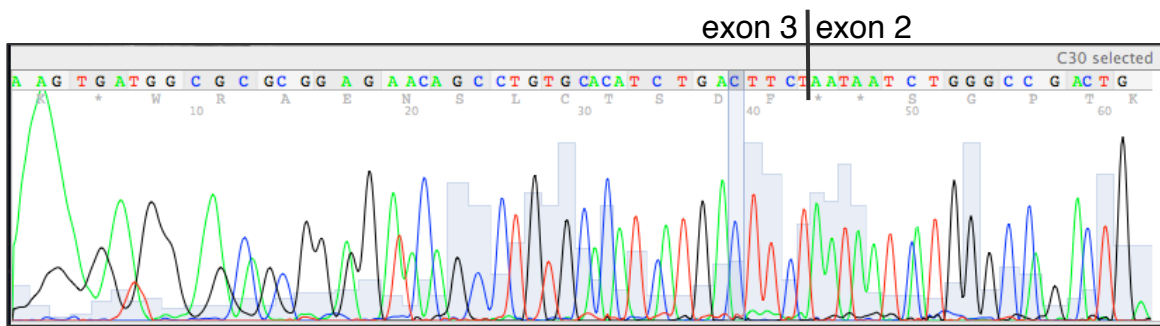

concatemer

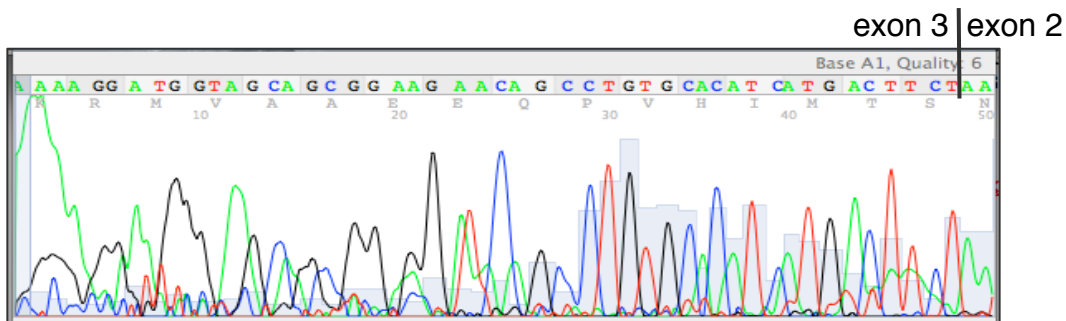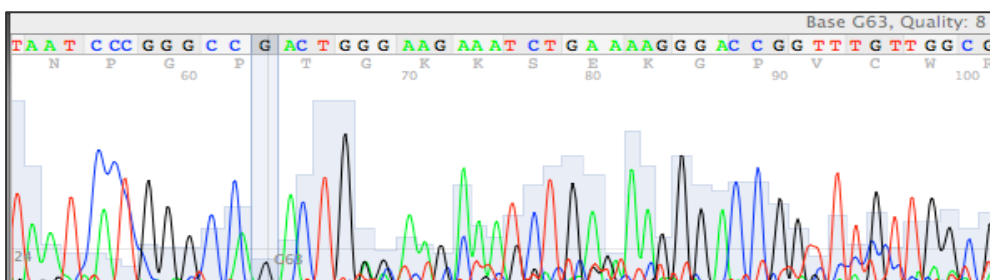



# Supplementary Figure 2

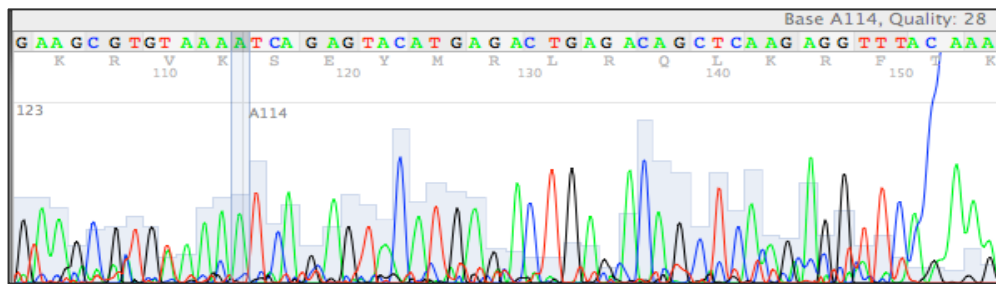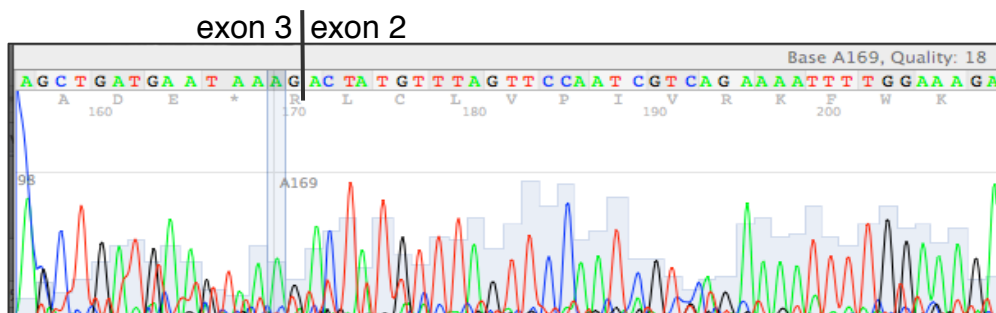

**e**

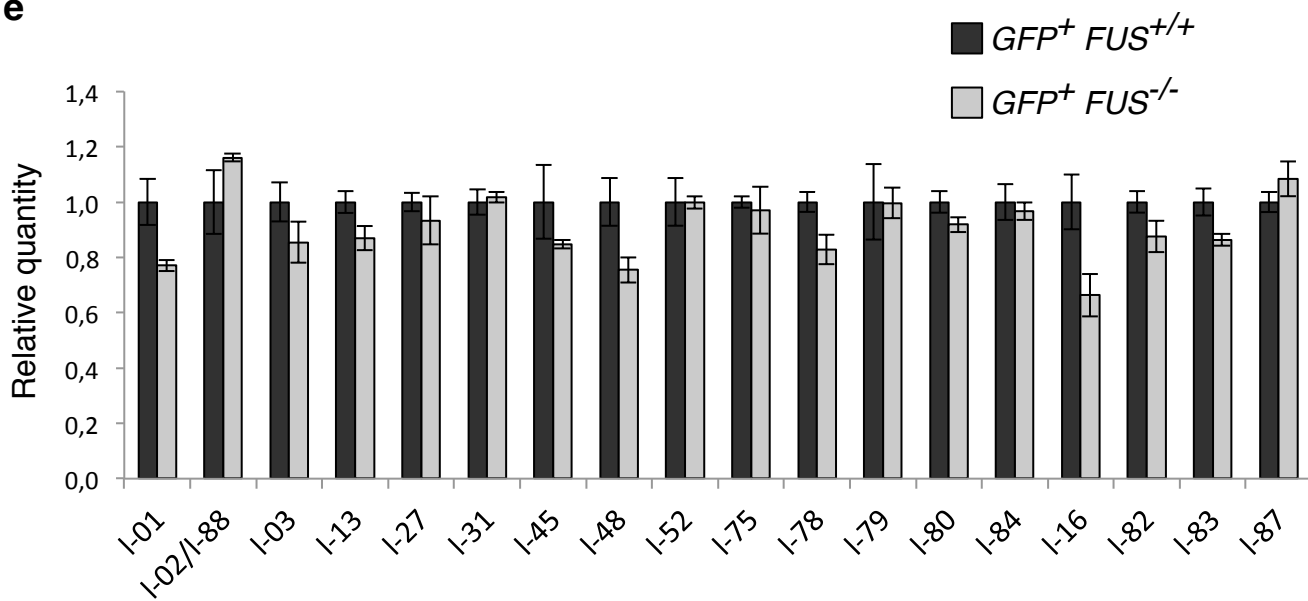

**f**

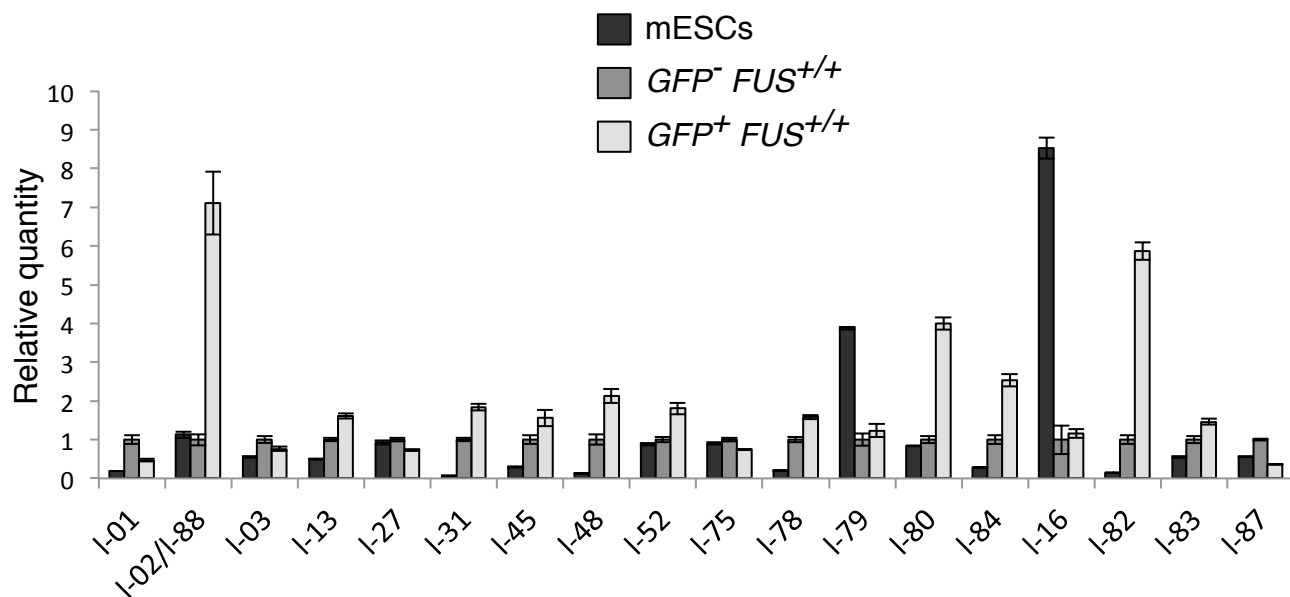

# Supplementary Figure 2

**g**

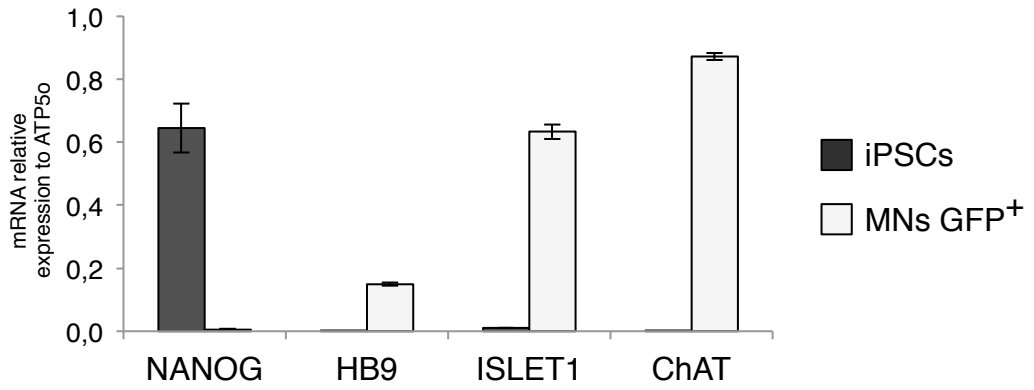

**h**

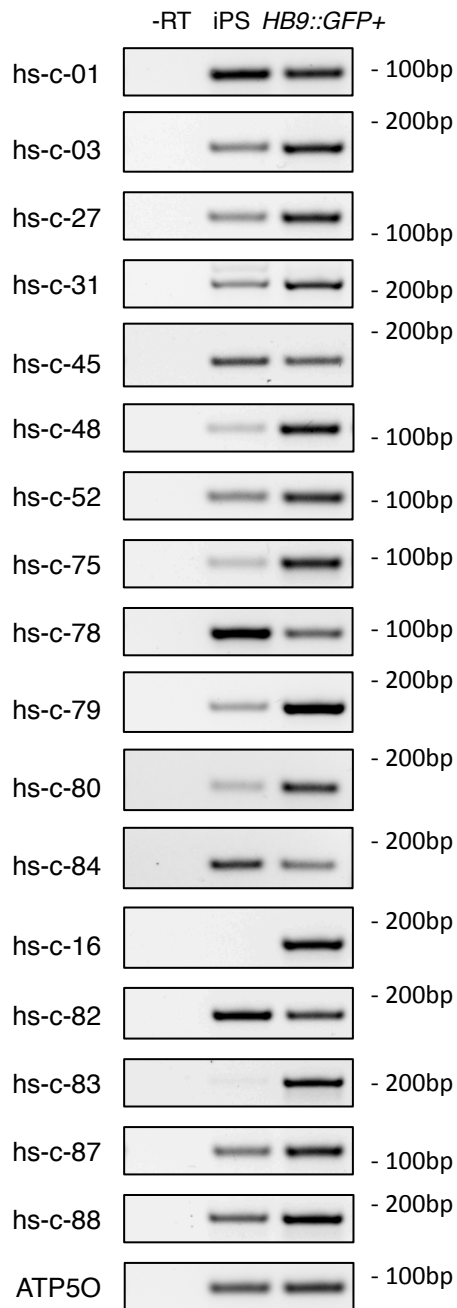

## Supplementary Figure 2

### Supplementary Figure 2:

(a) Schematic representation of the primers used for RT-PCR amplification of circular (red) and linear (blue) RNA molecules. (b) Total RNA extracted from EBs at d6 of differentiation was treated (+) or not (-) with RNaseR. For each circRNA molecule both the circular form and the linear counterparts are amplified through RT-PCR. Since c-02 and c-88 arise from the same gene, only one linear counterpart has been analysed and named l-02/l-88. (c) Upper panel: Sequence of the circularising exons for c-01; sequence of the forward oligonucleotide used for sequencing is underlined; middle panel: agarose gel showing the results of RT-PCR on EBs using divergent oligonucleotides listed in Supplementary Table 3. Lower panels: electropherograms showing the sequence of both back-splicing product and concatemer detected in RT-PCR analysis. The linear and back splice junctions are indicated. (d) Upper panel: sequence of the circularising exons for c-87; sequence of the forward oligonucleotide used for sequencing is underlined; middle panel: agarose gel showing the results of RT-PCR on EBs using divergent oligonucleotides listed in Supplementary Table 3. Lower panels: electropherograms showing the sequence of both back-splicing product and concatemer detected in RT-PCR analysis. The linear and back splice junctions are indicated. (e) Histograms show the expression level of linear host transcripts for circRNAs analysed in Fig. 2a measured by qRT-PCR in sorted *GFP<sup>+</sup>-FUS<sup>+/+</sup>* and *GFP<sup>+</sup>-FUS<sup>-/-</sup>* cells. The linear RNA levels were normalized toward Atp5o mRNA levels and expressed as relative quantity respect to *GFP<sup>+</sup>-FUS<sup>+/+</sup>* sample set to a value of 1. Error bars represent s.e.m. of three independent experiments and two-tailed Student's t-test was applied. (f) The histogram shows the expression level of linear transcripts shown in Fig. 2b, measured by qRT-PCR, in *FUS<sup>+/+</sup>* mESCs, *GFP<sup>+</sup>* and *GFP<sup>-</sup>* cells. The linear RNA levels were normalized toward Atp5o mRNA levels and expressed as relative quantity respect to *GFP<sup>-</sup>* samples set to a value of 1. Error bars represent s.e.m. of three independent experiments. (g) Analysis of MN markers in iPSCs and in human *HB9::GFP<sup>+</sup>* cells (MNs *GFP<sup>+</sup>*). mRNA levels are normalized against Atp5o mRNA levels. (h) *HB9::GFP* human iPSCs were either maintained in proliferation medium or induced to MN differentiation and the *GFP<sup>+</sup>* fraction purified by FAC sorting. CircRNA expression was analysed by RT-PCR and ATP5O mRNA was used as endogenous control. -RT samples were also analysed as control.

# Supplementary Figure 3

**a**

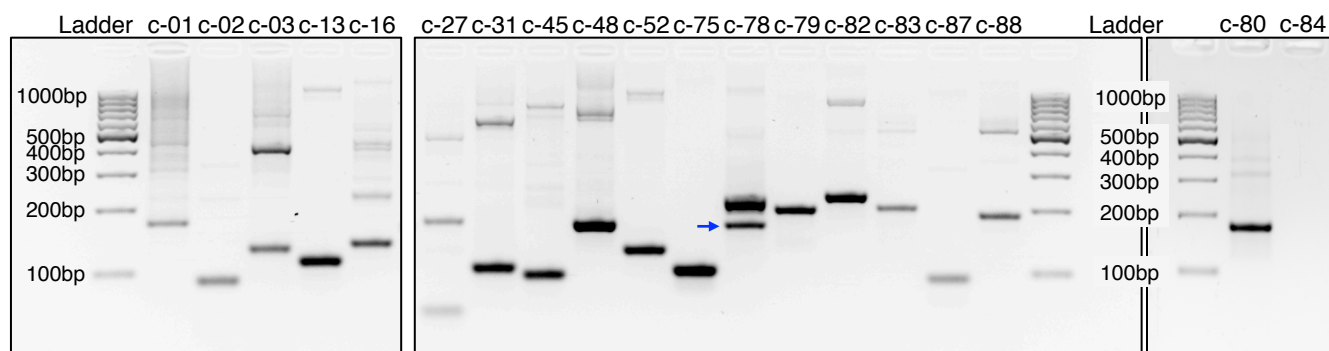

**b**

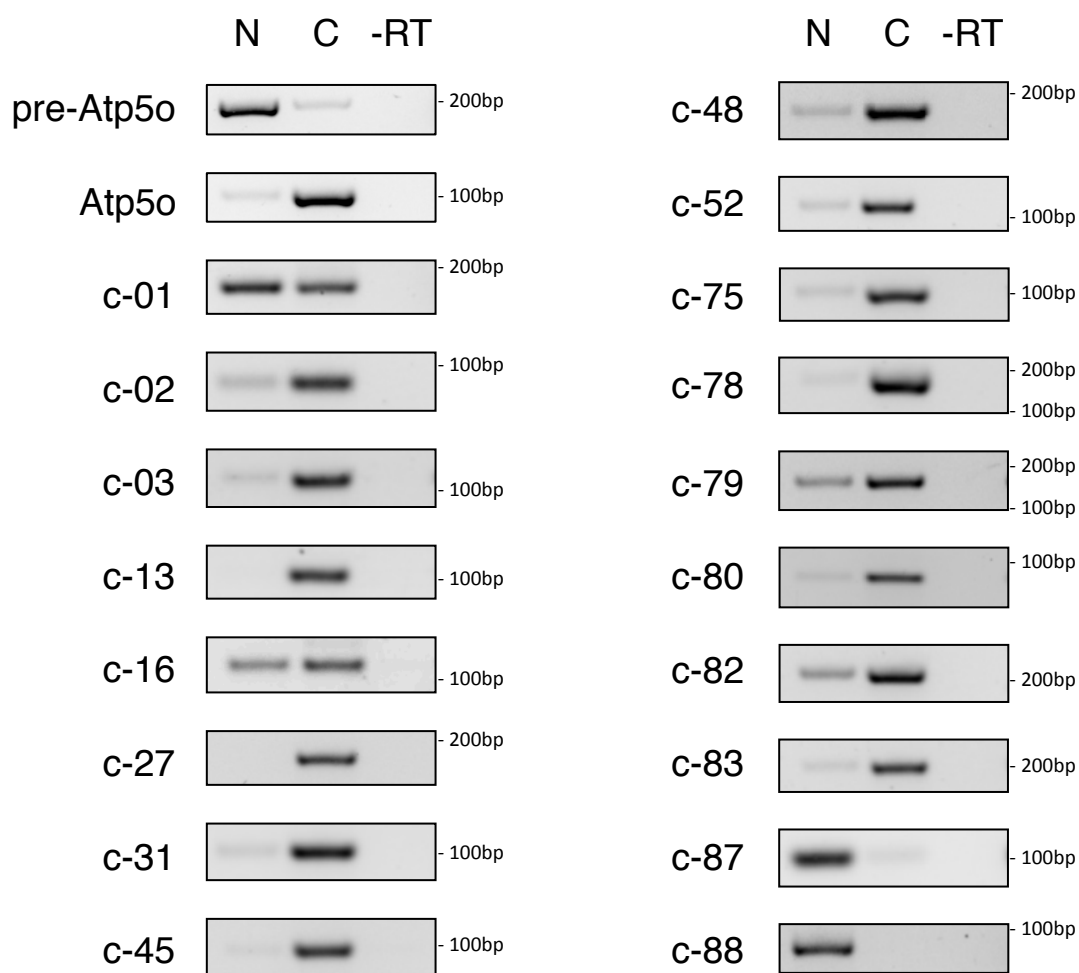

## Supplementary Figure 3

**c**

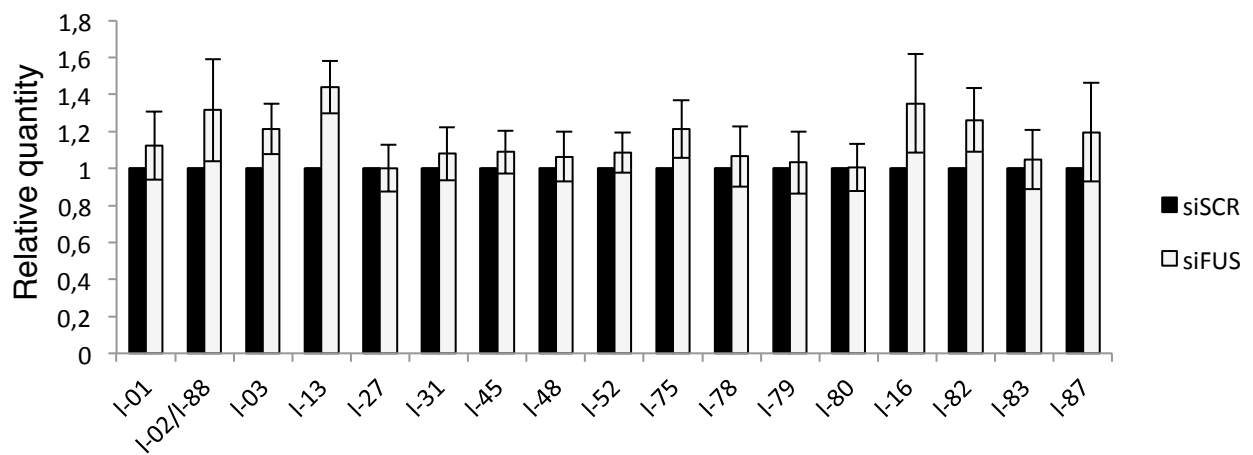

**d**

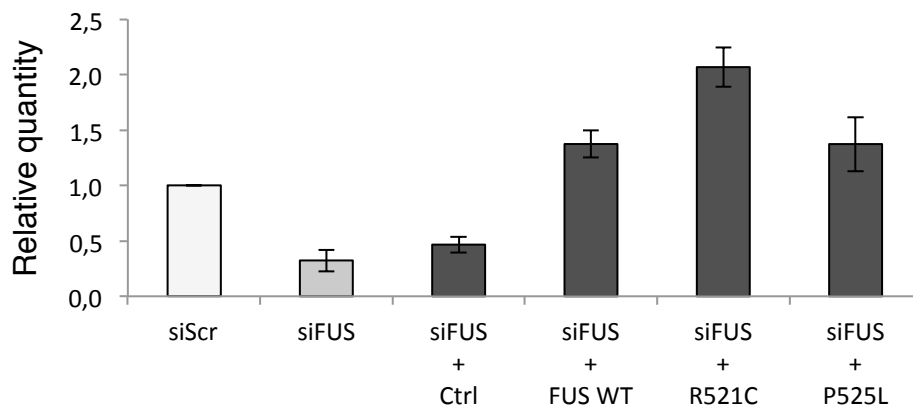

### Supplementary Figure 3:

(a) The expression of 19 circRNAs in differentiated N2a cells assayed through RT-PCR. The arrow indicates the specific amplification product for c-78. (b) The cellular sub-localization of selected circRNAs was analysed in nuclear (N) and cytoplasmic (C) compartments in differentiated N2a cells. The RT-PCR analyses were performed using specific primers for the circRNA molecules, as schematically represented in Supplementary Fig. 2a. Pre-Atp5o and Atp5o transcripts are used as control to check the quality of nuclear/cytoplasmic fractionation. (c) Histograms show the expression levels of the linear RNA counterparts of the circRNAs analysed in Fig. 3b, in differentiated N2a cells depleted (siFUS) or not (siScr) for FUS, analysed by qRT-PCR. circRNAs levels were normalized toward Atp5o mRNA and the values were then normalized to siScr samples set to a value of 1. Since c-02 and c-88 arise from the same gene, only one linear counterpart has been analysed and named l-02/l-88. Error bars represent s.e.m. of three independent experiments. Error bars represent s.e.m. of three independent experiments and two-tailed Student's t-test was applied. (d) Histograms show the quantification of four western blot analyses of the experiments in Figure 3a, 3b and 3c. The values were normalised for GAPDH expression. Error bars represent s.e.m. of four independent experiments

# Supplementary Figure 4

**a**

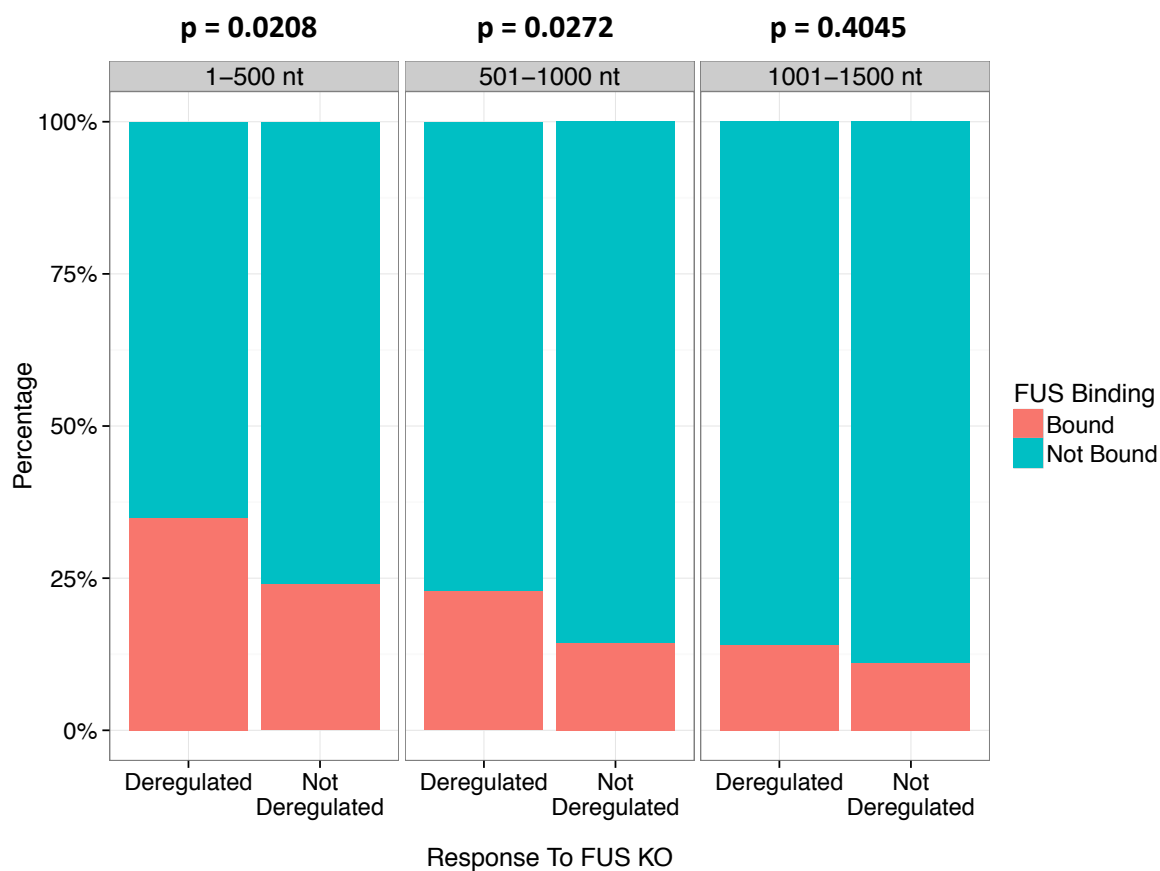

**b**

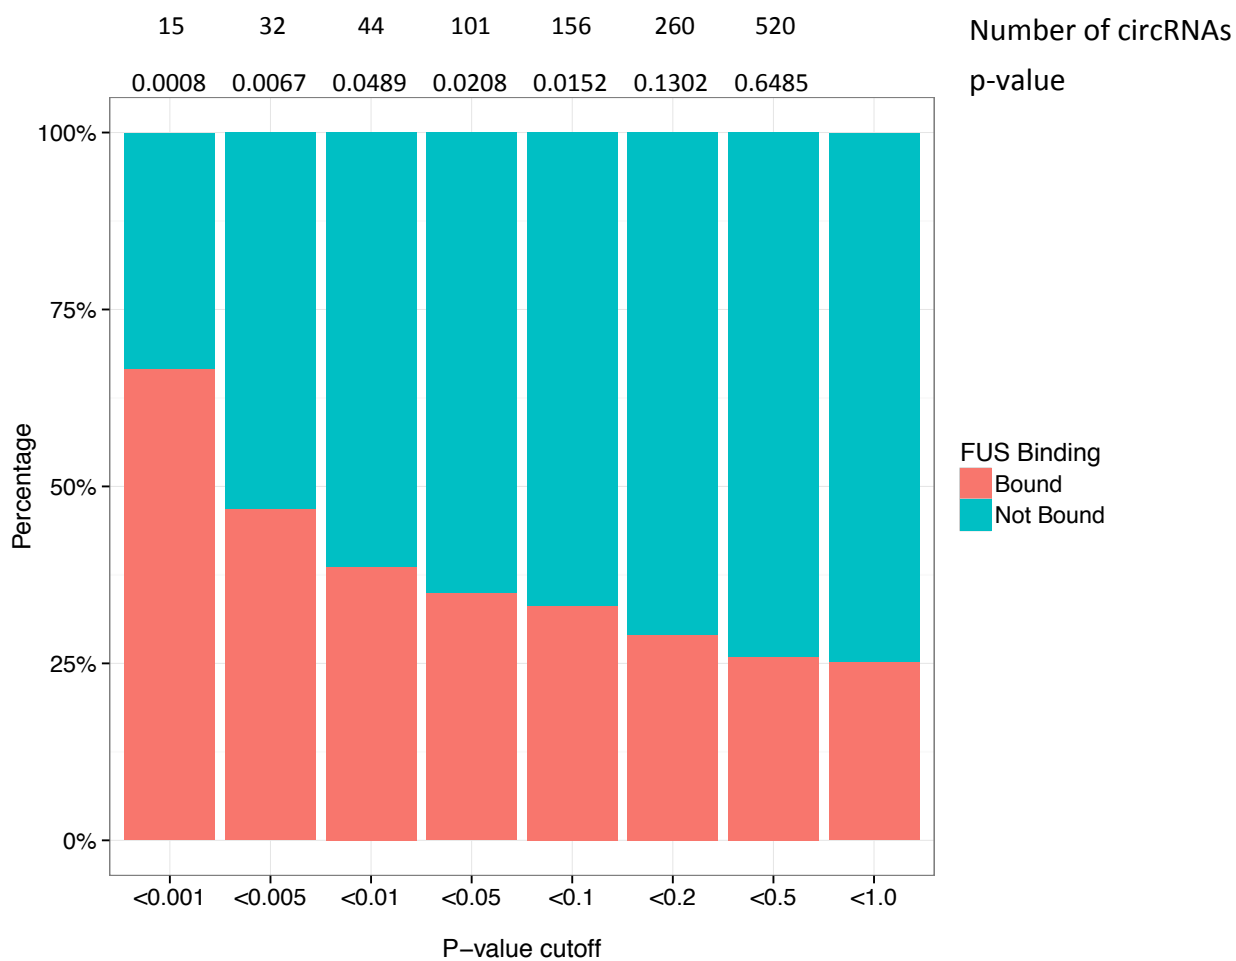

## Supplementary Figure 4

**c**

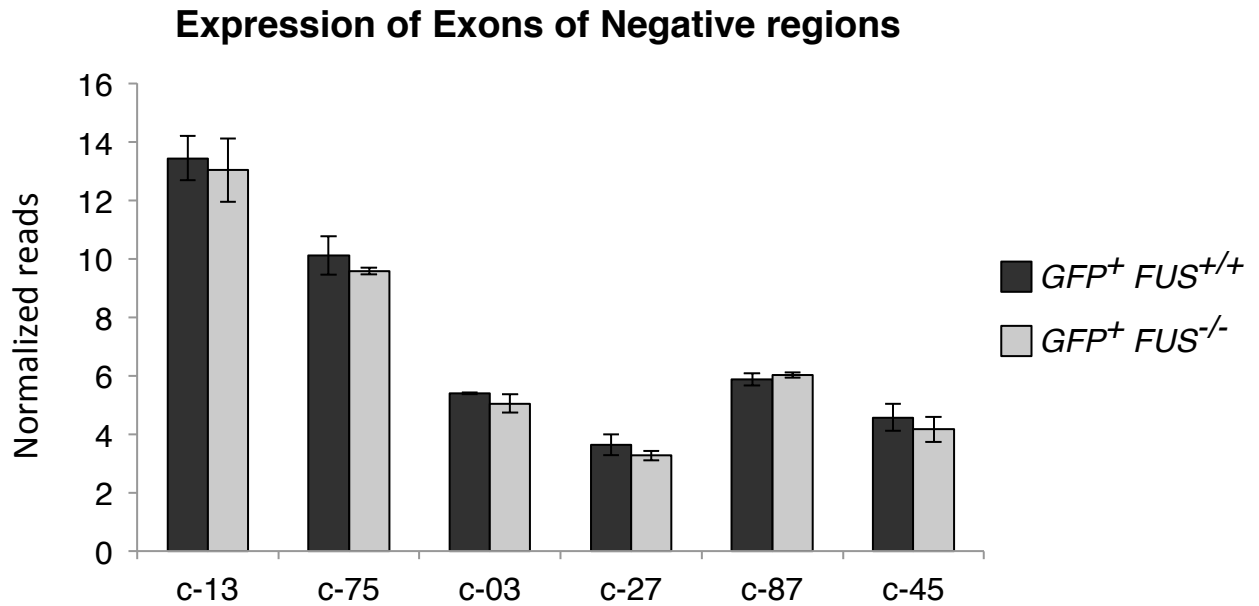

### Supplementary Figure 4:

(a) Bar plot showing the fraction of deregulated and unaltered circRNAs whose flanking intronic regions (divided into three 500 nt-long regions) are bound by FUS. (b) Bar plot showing the fraction of deregulated circRNAs (selected using different p-value thresholds) whose flanking 500 nt-long intronic regions are bound by FUS. (c) Histogram shows the quantification of the expression of the exons used as negative loci in CLIP experiments (NEG, Fig. 4d) in  $FUS^{+/+}$  and  $FUS^{-/-} GFP^+$  samples. The data shown arise from RNAseq analysis and are calculated as number of reads normalized on millions of reads of each sample.

## Supplementary Figure 5

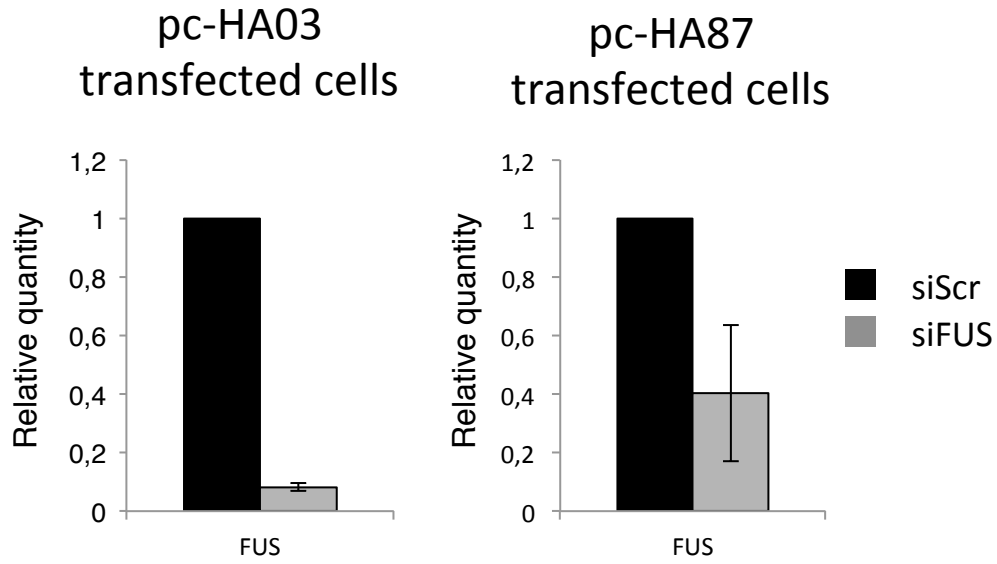

### Supplementary Figure 5:

FUS RNA levels in N2a cells depleted (siFUS) or not (siScr) for FUS and transfected with pc-HA03/87 constructs.



# Supplementary Figure 6

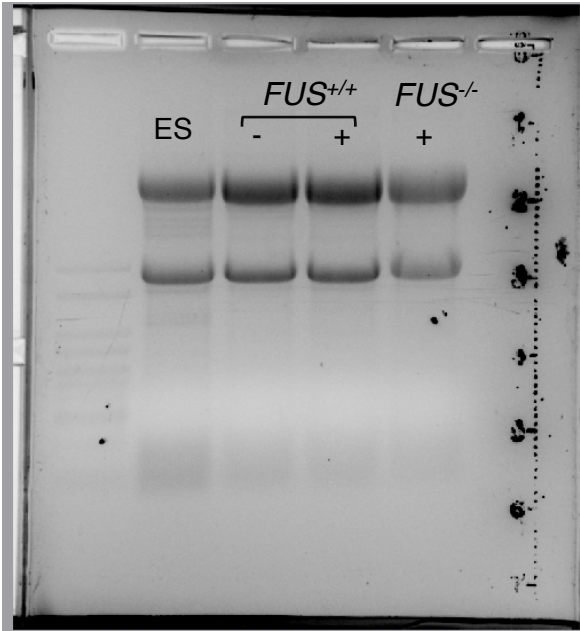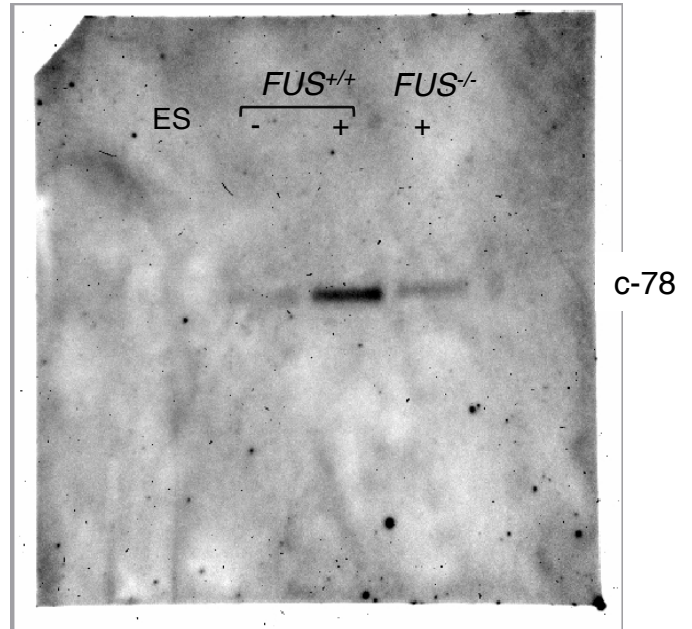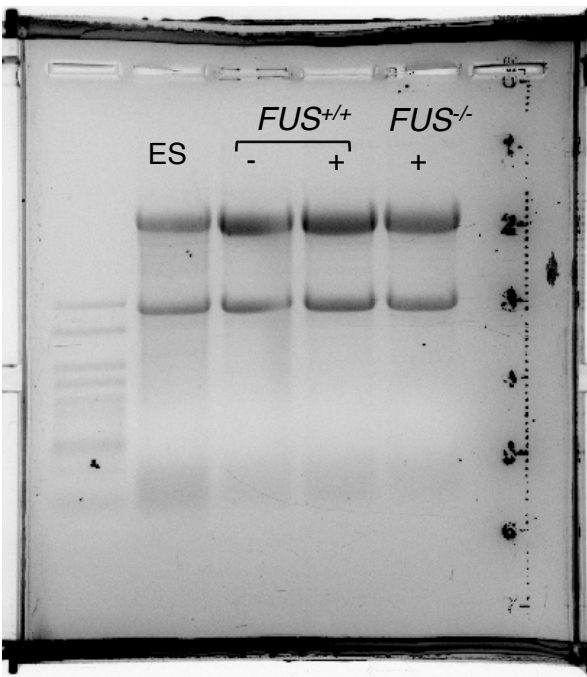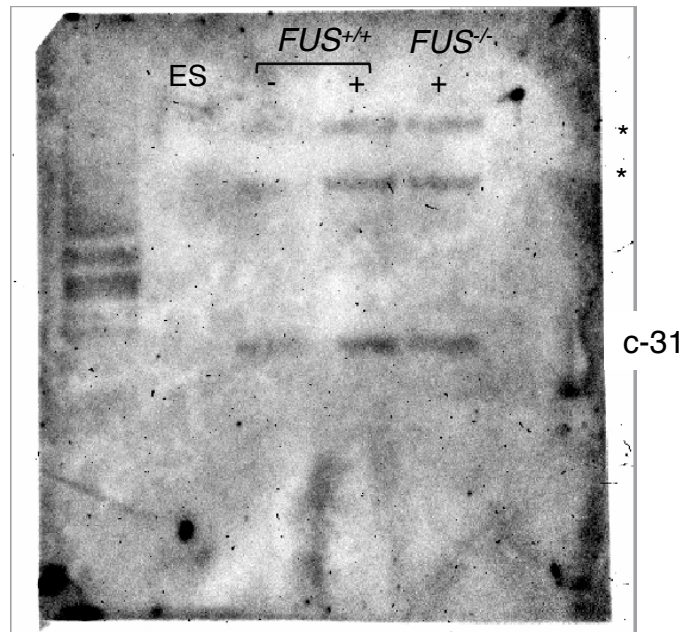

## Supplementary Figure 6:

Uncropped versions of Northern blots shown in Supplementary Figure 2c.

## Supplementary Figure 7

**a**

kDa

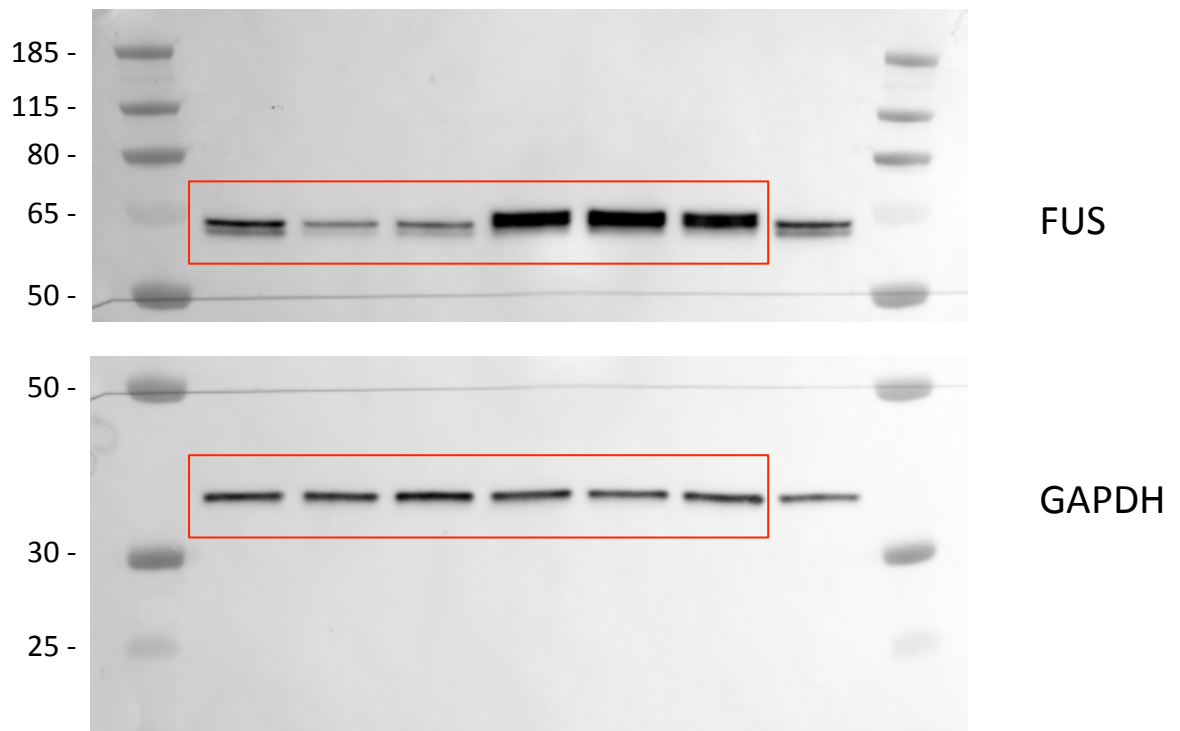

**b**

kDa

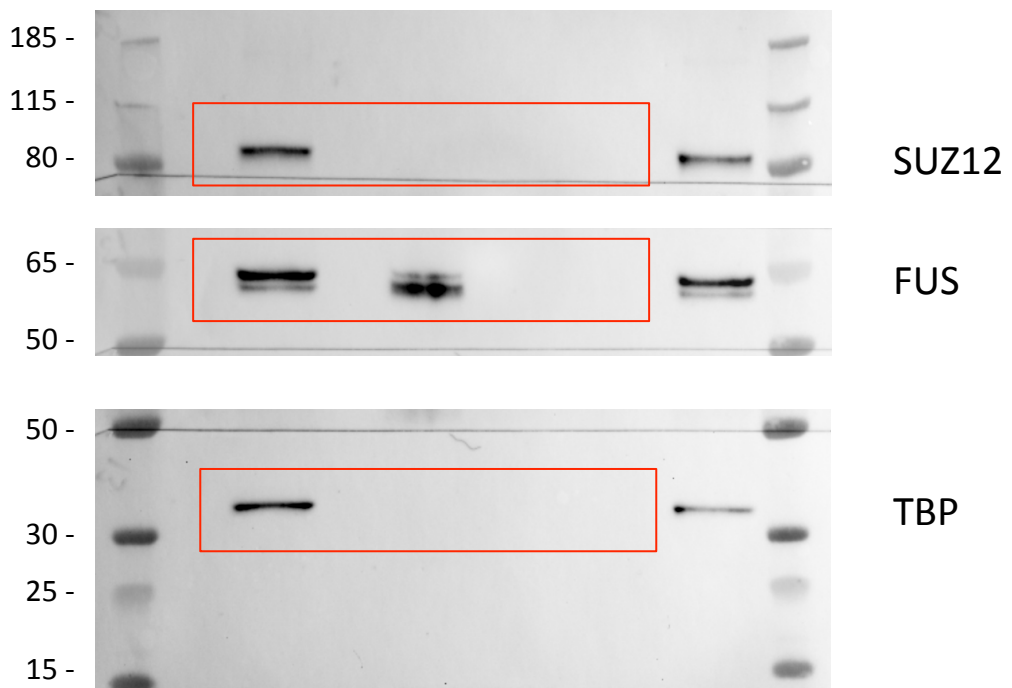

### Supplementary Figure 7:

(a) Uncropped versions of Western blots shown in Figure 3a. (b) Uncropped versions of Western blots shown in Figure 4a.

## Supplementary References

- 1 Hicks, G. G. *et al.* Fus deficiency in mice results in defective B-lymphocyte development and activation, high levels of chromosomal instability and perinatal death. *Nat. Genet.* **24**, 175–9 (2000).
- 2 Wichterle, H., Lieberam, I., Porter, J. A. & Jessell, T. M. Directed differentiation of embryonic stem cells into motor neurons. *Cell* **110**, 385–397 (2002).
- 3 Wichterle, H., Peljto, M., Wichterle, H. & Peljto, M. Differentiation of Mouse Embryonic Stem Cells to Spinal Motor Neurons. *Curr. Protoc. Stem Cell Biol.* **Chapter 1**, 1H.1.1–1H.1.9 (2008).

## Supplementary Table 1. List of oligonucleotides used for the experiments.

The sequence of the oligonucleotides are indicated in 5'-3' direction.

|                                                            | Forward                    | Reverse                      |
|------------------------------------------------------------|----------------------------|------------------------------|
| <b>Primers used for RT-PCR analysis in mouse samples:</b>  |                            |                              |
| c-01                                                       | ATGCCATAAGTTCCACCAACCC     | CGGCTGAGTGCCATTCTCTG         |
| c-02                                                       | ACTTCCCCTTGCTGAGCTTG       | TACTGTGAACCTGGGCTCGG         |
| c-03                                                       | CAAGCTGGACCGCAGTGATG       | GCTATTGCTTCATCATCAACTGTCTGT  |
| c-13                                                       | ATCCATGCTTTGCCGAGAG        | CCCAAACCAATTTCTGACTGT        |
| c-16                                                       | CGTGACCACCCAGGAGACTG       | ATATGACACTCAAAGGGATGGAAGT    |
| c-27                                                       | GCAGCAGCTTGTC AATT CAGTTAT | TCCAAAAAGATGTGCACAAGCC       |
| c-31                                                       | AGACGCTGGCAATGACACGA       | TACTTGTGTTGCTGGAGGCTTCA      |
| c-45                                                       | GGAGACACTATGGAGAATGTGGAAG  | CCTCATCCTCTTCTTCATCAGTGG     |
| c-48                                                       | AGAATGACGGCAGCCAGTCC       | GGCGATTTCTCTCTATATCCAT       |
| c-52                                                       | CTGACAGGAGCAACAGAGGGTG     | CCTCCTCTGTGACACTCTTGATAC     |
| c-75                                                       | CTCACAGGTAGATTCTGGCACG     | GCATACTTAACATCTTTATTCTTCTCAC |
| c-76                                                       | GAAGATCCACTACTGTCTCTGTTG   | CTTTGTAGTTCCTCATTGCCA        |
| c-77                                                       | ACCTTCAACCCACCAACACG       | CTTTGTAGTTCCTCATTGCCA        |
| c-78                                                       | TCGTATGGGGCAGTTTAGGACT     | CACGCCTTCATAGTAAAGCTGG       |
| c-79                                                       | CACGTTCTCTGAACCAGAACCG     | TTCAAAGCCAGATCCTGTG          |
| c-80                                                       | GCAGGGGCTCACAGGAAACAT      | GCATTTCAAACCATCTCCATCTTC     |
| c-82                                                       | CCAACTCAAGGCATGTCTGTG      | GCTTCCCTCAGCTCGGTGAA         |
| c-83                                                       | TTGTCCAAAAGAAGTACAGATCAA   | ATTCAAGCATTGGAAGAATTTAGAG    |
| c-84                                                       | CGGGAGAAATGGATCTACTACC     | TTCTGCTGGGCACTTGTCG          |
| c-87                                                       | CAGTCTGGCCATGATTATTAGAAGT  | TTGGAAAAGAACTGAAACCTTAAACC   |
| c-88                                                       | ATACAAGGGTTTACAGATTGGGAC   | GGCTCAGTATCTTAGGCAAAGTCTAG   |
| I-01                                                       | GTCCACCCCAACATCTACTCCA     | CGGCTGAGTGCCATTCTCTG         |
| I-02/I-88                                                  | ATACAAGGGTTTACAGATTGGGAC   | TCAACATCTAACTCATCATTGCTTTC   |
| I-03                                                       | CCCTGCTGGAGTTCATACCC       | CACCCTTGGGCATCGTTCTC         |
| I-13                                                       | ATCAGCAGCCACCCCTTGA        | CTTTTCCAATTTGATGTAGGTTTCC    |
| I-16                                                       | CGTGACCTCAGCCAGCAATG       | ATATGACACTCAAAGGGATGGAAGT    |
| I-27                                                       | CTTCAACCACCTTCTCTCG        | CGCTCATCCTCACTCCAGAAA        |
| I-31                                                       | GCGAGCAGGAGAACGACCG        | TACTTGTGTTGCTGGAGGCTTCA      |
| I-45                                                       | GGAGACACTATGGAGAATGTGGAAG  | AGAGCCGTGTCCTTGTTGGG         |
| I-48                                                       | AGAATGACGGCAGCCAGTCC       | TCATCCAGTTCTCATCTCCACT       |
| I-52                                                       | AGACTCATCGCTCGCCTTCC       | ATTACTGCCAAGTTGTGCTCCG       |
| I-75                                                       | ATCCTACACTACATCCAGCACGA    | GCATACTTAACATCTTTATTCTTCTCAC |
| I-76                                                       | GAAGATCCACTACTGTCTCTGTTG   | TTACTTTCCAAATTTCTACGTGTTG    |
| I-77                                                       | ACCTTCAACCCACCAACACG       | CCACTAACACGGTATAGTCCCTCAG    |
| I-78                                                       | CATTGAATATAGACCTGAAAACCATC | CCTCTTCCATCGCTAAGTGC         |
| I-79                                                       | GCCTTCAGCCTCAGAACCG        | TTCAAAGCCAGATCCTGTG          |
| I-80                                                       | AGGCAGAGGCAAGAGCAACT       | GCATTTCAAACCATCTCCATCTTC     |
| I-82                                                       | GCTTCCCTCAGCTCGGTGAA       | CACCTGTAAGGCTTCTCACCTGTGT    |
| I-83                                                       | CTCTATCTGTAGGTGCTGCTGCC    | CCTCCATCGAGAAAATAATCCAC      |
| I-84                                                       | CGGCTCTCTTCTCTGTTGG        | AGAGTCTTTTGTCTGTTGAGC        |
| I-87                                                       | TTGGAAAGAAGTCAAACCTTAAACC  | TCACTGGTGACTGAACAAGAAGTC     |
| Atp5o                                                      | CAACCGCCTGTACTCTGCT        | GGATTCAAGACAGCCAGAGACAC      |
| pre-ATP5o                                                  | TGGAACCTACAGCAACACACGC     | CTCAGTGACAATGCCATCCCTA       |
| <b>Primers used for RT-qPCR analysis in mouse samples:</b> |                            |                              |
| c-01                                                       | ATGCCATAAGTTCCACCAACCC     | TGGCTGTTCCAGAAAGCATCG        |
| c-02                                                       | ACTTCCCCTTGCTGAGCTTG       | TACTGTGAACCTGGGCTCGG         |
| c-03                                                       | CAAGCTGGACCGCAGTGATG       | GCTATTGCTTCATCATCAACTGTCTGT  |
| c-13                                                       | AAACTCTTCTTATCCAGAGACAGTCA | TGTACCCTCTCCGAGCTTTTCC       |
| c-16                                                       | AAGCACTCTCGGGGTCAGCA       | GATCTGCCATGTTGTCCACTTTC      |
| c-27                                                       | GAGATCAACTTCCGTGGAGAATG    | CCTTTACGCCAGCAAATAACTGA      |
| c-31                                                       | AGACGCTGGCAATGACACGA       | TACTTGTGTTGCTGGAGGCTTCA      |
| c-45                                                       | GGAGACACTATGGAGAATGTGGAAG  | CCTCATCCTCTTCTTCATCAGTGG     |
| c-48                                                       | AGAATGACGGCAGCCAGTCC       | GGCGATTTCTCTCTATATCCAT       |
| c-52                                                       | CTGACAGGAGCAACAGAGGGTG     | CCTCCTCTGTGACACTCTTGATAC     |
| c-75                                                       | CTCACAGGTAGATTCTGGCACG     | GCATACTTAACATCTTTATTCTTCTCAC |
| c-78                                                       | TCGTATGGGGCAGTTTAGGACT     | CACGCCTTCATAGTAAAGCTGG       |
| c-79                                                       | CACGTTCTCTGAACCAGAACCG     | AAGATGATTTTCAACAATAAACAGCAG  |
| c-80                                                       | GCAGGGGCTCACAGGAAACAT      | GCATTTCAAACCATCTCCATCTTC     |
| c-82                                                       | CCACCAGAGGACTCACACAGACAT   | GAAGCAGTCCAAGTCTCACCA        |
| c-83                                                       | TTGTCCAAAAGAAGTACAGATCAA   | TGTGTACTGTGGTATCTTCTGATG     |
| c-84                                                       | CGGGAGAAATGGATCTACTACC     | TTCTGCTGGGCACTTGTCG          |
| c-87                                                       | AAGACTATGTTTAGTTCCAATCGTCA | CAGTCTGGCCATGATTATTAGAAGT    |
| c-88                                                       | ATCTGCCCTCCAACCTGCTT       | GGCTCAGTATCTTAGGCAAAGTCTAG   |
| I-01                                                       | GTCCACCCCAACATCTACTCCA     | CGGCTGAGTGCCATTCTCTG         |
| I-02/I-88                                                  | ATCTGCCCTCCAACCTGCTT       | TCAACATCTAACTCATCATTGCTTTC   |

|            |                             |                            |
|------------|-----------------------------|----------------------------|
| I-03       | CCCTGCTGGAGTTCATACCC        | CACCTTGGGCATCGTTCTC        |
| I-13       | ATCAGCAGCCACCCTTTGA         | TGTACCCTCTCGAGCTTTTCC      |
| I-16       | CGTGACCTCAGCCAGCAATG        | ATATGACACTCAAAGGGATGGAAGT  |
| I-27       | GAGATCAACTCCGTGGAGAATG      | CGCTCATCCTCACTCCAGAAA      |
| I-31       | GCGAGCAGGAGAACGACCC         | TACTTGTCTGGAGGCTTCA        |
| I-45       | GGAGACACTATGGAGAATGTGGAAAG  | AGAGCCGTGTCTTGTGGG         |
| I-48       | AGAATGACGGCAGCCAGTCC        | CGTGCTTCTGAACAGTGTCTCC     |
| I-52       | AGACTCATCGCTCGCCTTCC        | ATTACTGCCAAGTTGTGCTCCG     |
| I-75       | CGCAACAGTACACGATCCCG        | AAAATGCAATCCGTGCCTGC       |
| I-78       | ATAGACCTGAAAACCATCTTCTTTATG | GCCAGGTGTTCTTCAAAACAATG    |
| I-79       | GCCTTCAGCCTCAGAACCC         | AAGATGATTTTCAATAAACAGCAG   |
| I-80       | AGGCAGAGGCAAGAGCAACT        | GCATTTCAAACCATCTCCATCTTC   |
| I-82       | GCTTCCCTCAGCTCGGTGAA        | CACTTGTAAAGGCTTCTCACCTGTGT |
| I-83       | CCTGTCCAGAGGCTCTACGC        | TGAGTTGTCCAAAAGAAGTCACAGCT |
| I-84       | CGGCTCTTCTCTGCTTGG          | AGAGTCTTTTGTCTGGTTGAGC     |
| I-87       | AAGACTATGTTTGTTCATCGTCAG    | TCACTGGTGACTGAACAAGAAGTC   |
| pre-c-HA87 | GCCAGGGCTACACTGAGAAATC      | AGCGTAATCTGGAACATCGATGGGTA |
| c-HA87     | AAGACTATGTTTGTTCATCGTCAG    | AGCGTAATCTGGAACATCGATGGGTA |
| pre-c-HA03 | TTGGCAGGTTTTATGTTTTGGT      | AGCGTAATCTGGAACATCGATGGGTA |
| c-HA03     | CAAGCTGGACCGCAGTGATG        | AGCGTAATCTGGAACATCGATGGGTA |
| Neomycin   | CTTGGGTGGAGAGGCTATTC        | TCAGTGACAACGTCGAGCAC       |
| Atp5o      | CAACCGCCTGTACTCTGCT         | GGATTCCAGAACGCCAGAGACAC    |
| Bhlhe22    | GCTGGTTGATGGGTCCGGAA        | GCCTCTGAGTCCAATCCCGC       |
| Chat       | TGGAGAGACAGGAGAAGACAG       | GCAGGGCTAGAGTTGACTGG       |
| Gfap       | GGCCCTGAGAGAGATTGCG         | GCGTCTGTGAGGCTGCAA         |
| Hb9        | TGCCAGCACCTTCCAAT           | CTTCCCAAGAGGTTGACT         |
| Isl1       | TGTGGACATTACTCCCTTTACA      | TCGTGAATTTGATTGCCGA        |
| Olig2      | GTTCTCCTCCGACGCGAG          | CTGGCGTCCGAGTCCATG         |
| Pax6       | GCCAGCAACTCCTAGTCA          | GTCTGTTCCGCCAACATG         |
| Pdgfra     | ACAACCACACTCAGACGGAT        | TGACTAAGGAATCGGTCATCCC     |
| Sim1       | TGTCTCCCTTTGATGGATGCT       | GCGTAGGTGGAAGGTGTCAC       |

**Primers used in ClIP experiments for RT-PCR analysis in mouse samples:**

|           |                            |                              |
|-----------|----------------------------|------------------------------|
| pre-FUS   | ATTTGGTGGTAAGTGAACAGATTT   | CCCTTCTGGAGGTGGCTACA         |
| pre-Atp5o | TGGAACCTACAGCAACACACGC     | CTCAGTGACAATGCCATCCCTA       |
| c-03 5'   | CATCTTGGTTGGTCACTGTGTG     | CACCCTTGGGCATCGTTCTC         |
| c-03 3'   | CAAGCTGGACCGCAGTGATG       | TGCTGTCTCTTGCCTTACTGTT       |
| c-03 NEG  | GGGATGAGAACAAGTCTGTGGC     | GGTTGTGACCTCTCGGGGA          |
| c-13 5'   | AAGAAGTAGAGTTTTAAGAATAGGCG | CTTTTCCAATTTGATGTAGGTTCC     |
| c-13 3'   | TTGCCGAGAGCGTATCAAT        | GTGAAATGGTTATGACAAACACAC     |
| c-13 NEG  | CCTAGAGTGATATTTTCTTCAACAA  | CAGTCTCCTTAAACTTTTTATCC      |
| c-27 5'   | TCTTATCCCACTTGAATGAAGT     | TCCAAAAGATGTGTCACAAGCC       |
| c-27 3'   | CTTCACCACCTTCTCTCG         | AAAATGGAGTCACATGAGCATAACG    |
| c-27 NEG  | GGATTAGAAAGATTGGCGATGG     | TTTCAAGTAGTGGAACTCTAGATT     |
| c-45 5'   | TTGGATCTTCGCACTAACATCTG    | CCTCATCCTCTTCTCATCAGTGG      |
| c-45 3'   | GGAGACACTATGGAGAATGTGGAAG  | GCTCTTGCCTTGACACTCAT         |
| c-45 NEG  | GAAAAGCGAGTAGAAAACTGGAAC   | TCTACCCTCTGAAAAGTCAATAATGT   |
| c-75 5'   | TTATCTGGTGGAAAGTTGGTTG     | GCATACTCTAACATCTTTATCTTCTCAC |
| c-75 3'   | CACTGGTAGTGGGTAATTTATGAT   | TCCTCCTTATGTAATAATAATCTTGTA  |
| c-75 NEG  | ATGGTGATTGTTTTATGTTGCCTC   | ACTTGTAACAGCATCCAAATGAGC     |
| c-87 5'   | TGGGCTTTTCTCTACAAATATCAAC  | TACTCTGATTTTACACGTTCCG       |
| c-87 3'   | TTGGAAGAACTGAAACCTTAAACC   | GCCACTGATACACTGAAACAAAG      |
| c-87 NEG  | TACTGCTGGCACCGTCTGATG      | GCTGCTACTATAACAAGTCAACTGG    |

**Primers used for RT-PCR analysis in human samples:**

|         |                             |                               |
|---------|-----------------------------|-------------------------------|
| hs-c-01 | TCTCCAACGACCTGAAACGG        | GGCTGTTACGAAAGGCATCG          |
| hs-c-03 | GAAGGACTCGGACACAGACGG       | CCCAGTCTGCTTCTCCACCAT         |
| hs-c-16 | GTCAGACTTCGTAAGAGAAAGGTGG   | GTCATCGTAGTTTAAACAACAGACAGAGA |
| hs-c-27 | CCTTTTACACATCCTTCTTTGAGA    | CCTACCTTTATACCAGCAAATACTGA    |
| hs-c-31 | TCCAGGAGATGAAGATGACAAAGAC   | CTTTGGGACCTAGAAATGCAGTT       |
| hs-c-45 | CCAAGATGGCCTAAGTCAAGACA     | CTTGCTTGTGCCAGTTCTGATG        |
| hs-c-48 | GCACCAGTGGCAAAAAGCG         | CTCTCCTCTATATCCATAGTACCCTG    |
| hs-c-52 | CTTAACTGGAGCAACTGAGGGTG     | TCTGGGTTTACAGAAGTCATTCA       |
| hs-c-75 | ACTTTTCTACAGGTAGATTCTGGC    | TCTTCTTACTAAGTCTTCTCAGGTTT    |
| hs-c-78 | TTTCTTCTGACTGGACAGTTTACAGTT | GGGCAATCTTCTAACAAGGCAT        |
| hs-c-79 | AGGATGTTGATGATGAGGACCA      | ATTCTGTGCGATGCTGTCTGG         |
| hs-c-80 | AGAAGTTCACAGAAAACCTCCAAG    | CCATCTTCTTACAGACTCCTCCATA     |
| hs-c-82 | CCACCAGAGGACTCACACAGACAT    | GGGTCTAAGCGACGGGAAG           |
| hs-c-83 | TCAAGCATTGGAAGAATTTAGGG     | TTGTCCAAAGGAATTCACAGATCA      |
| hs-c-84 | CGAGGACTCTGAAAAGGGGC        | GCTGTGGTGGTCTAAGGAATC         |
| hs-c-87 | AAGAGTATGTTTGTTCATCGTCAG    | CAGTCTGGCCCATGATTATTAGAAG     |
| hs-c-88 | CCGAGAACTGGAAGAGATGGG       | GGCTCAGTATCTTAGGCAATGTCTAG    |
| ATP5O   | ACTCGGTTTACCTACAGC          | GGTACTGAAGCATCGCACCT          |

**Primer used for RT-qPCR analysis in human samples:**

|         |                           |                           |
|---------|---------------------------|---------------------------|
| hs-c-80 | AGAAGTTCACAGAAAACACTCCAAG | CCATCTTCTTTACAGACTCTCCATA |
| hs-c-84 | CGAGGACTCTGAAAAAGGGGC     | GCTGTGGTGGTGCTAAGGAATC    |
| ATP5O   | ACTCGGGTTTGACCTACAGC      | GGTACTGAAGCATCGCACCT      |
| ChAT    | TCATTAATTTCCGCCGTCTC      | GAGTCCCGTTGGTGGAGT        |
| HB9     | GAGACCCAGGTGAAGATTTG      | CCTTCTGTTTCTCCGCTTCC      |
| ISLET1  | TACAAAGTTACCAGCCACC       | GGAAGTTGAGAGGACATTGA      |
| NANOG   | CCAAATTCTCTGCCAGTGAC      | CACGTGGTTTCCAACAAGAAA     |

**Primer used for probes amplification in Northern Blot analysis:**

|         |                                             |                            |
|---------|---------------------------------------------|----------------------------|
| T7-c-31 | TAATACGACTCACTATAGGGATAGGGTACTGTTTGCTGGAGG  | AGACGCTGGCAATGACACGA       |
| T7-c-78 | TAATACGACTCACTATAGGGTAAGATATCATCTGCCAACTGAG | CATTGAATATAGACCTGAAAACCATC |

**Primer used for circRNA cloning:**

|                       |                                          |                                                  |
|-----------------------|------------------------------------------|--------------------------------------------------|
| c-87 intron1-exon2    | GTTTAACTTAAGCTTTCTCTGTGTAGTCTTGGCTGTCTTG | CTTTACTTCATCAGCTCTTCTGAACC                       |
| c-87 exon3-intron3    | GCTGATGAAGTAAAGACTATGTTTAGTTCCAATCGTCAGA | CTGGACTAGTGGATCCTCCACAAGGACAAAATCTGAACTC         |
| c-87 HA tag insertion | GTTCCAGATTACGCTAATCATGGGCCAGACTGGGA      | ATCGTATGGGTAATTCTAAAAGCAATGATTTTCATATTATAATCACTT |
| c-03 intron1-exon2    | TACCGAGCTCGGATCCCGGAGCCTTGAGGTTTAGAAGCAG | ACTTTATCTTTATCCTTTTTCCAGTTTGTCTCCACCA            |
| c-03 exon3-intron3    | AAAGGATAAAGATAAAGTTTCTCTAACCAAG          | GCCCTCTAGACTCGAGTCCACTCCATCATACCCCGT             |
| c-03 HA tag insertion | TCCAGATTACGCTAAGCAATAGCAGCATAAATGAAGAT   | ACATCGTATGGGTACATCATCAACTGTCTGTTTCAAA            |
